# Supplementary material for: The Combined Effects of an External Field and Novel Functional Groups on the Structural and Electronic Properties of TMDs/Ti3C2 Heterostructures: A First-Principles Study
Source: MDPI journal article supplement (doi:10.3390/nano13071218), 2023-03-29
Supplement: s1 [file s1]

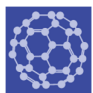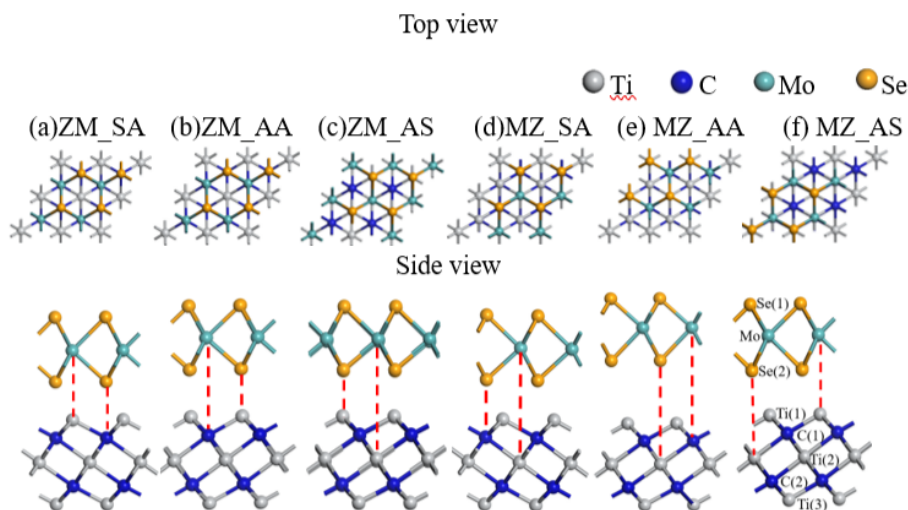

**Figure S1.** A schematic diagram of top and side views of MoSe<sub>2</sub>/Ti<sub>3</sub>C<sub>2</sub> heterostructures for different stackings. (a) the ZM\_SA Configuration: Se and Mo atoms of MoSe<sub>2</sub> are on top of Ti and C atoms of Ti<sub>3</sub>C<sub>2</sub>, respectively; (b) the ZM\_AA Configuration: Se and Mo atoms of MoSe<sub>2</sub> are on top of C and Ti atoms of Ti<sub>3</sub>C<sub>2</sub>, respectively; (c) the ZM\_AS Configuration: Se and Mo atoms of MoSe<sub>2</sub> are on top of Ti atoms and hollow sites of Ti<sub>3</sub>C<sub>2</sub>, respectively; (d) the MZ\_SA Configuration: Se and Mo atoms of MoSe<sub>2</sub> are on top of C atoms and hollow sites of Ti<sub>3</sub>C<sub>2</sub>, respectively; (e) the MZ\_AA Configuration: Mo and Se atoms of MoSe<sub>2</sub> are on top of C atoms and hollow sites of Ti<sub>3</sub>C<sub>2</sub>, respectively; (f) the MZ\_AS Configuration: Mo and Se atoms of MoSe<sub>2</sub> are on top of Ti atoms and hollow sites of Ti<sub>3</sub>C<sub>2</sub>, respectively.

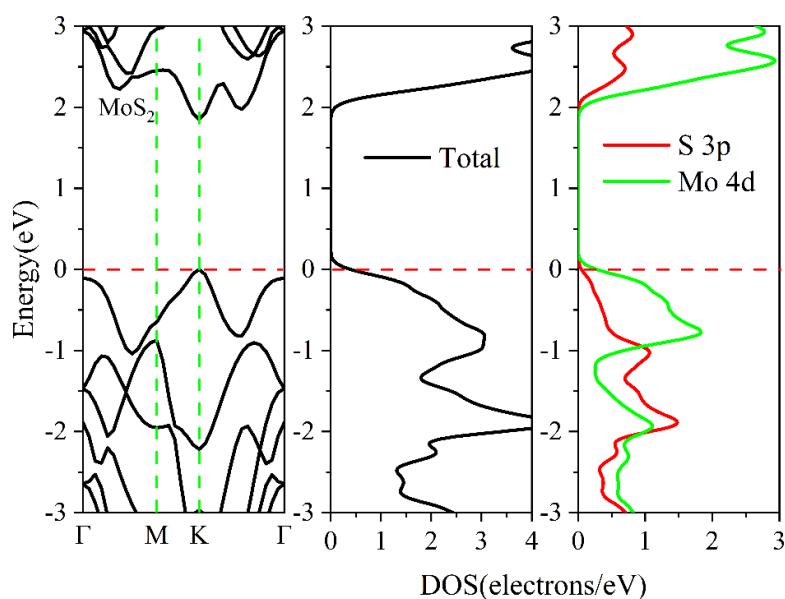

**Figure S2.** Band structures and densities of states of the MoS<sub>2</sub>. The Fermi level is set to 0 eV. The vertical dashed line gives the location of the Fermi level.

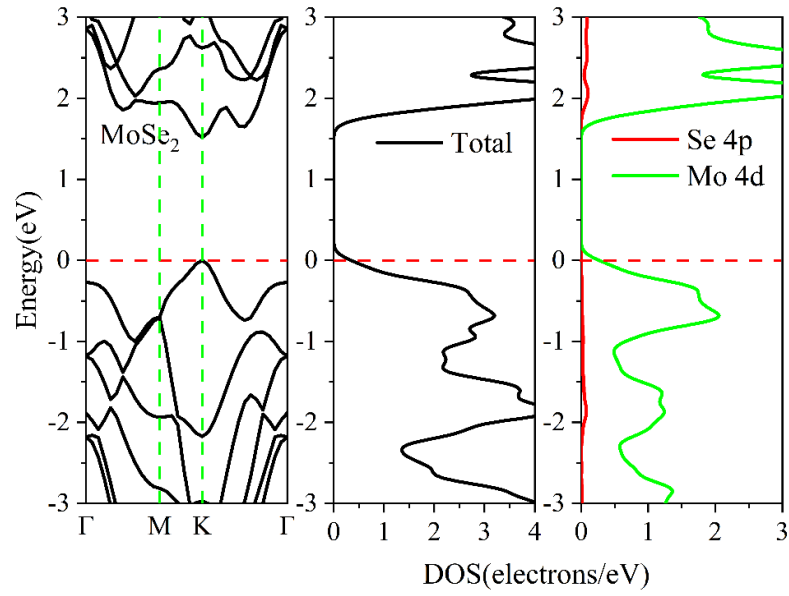

**Figure S3.** Band structures and densities of states of the MoSe<sub>2</sub>. The Fermi level is set to 0 eV. The vertical dashed line gives the location of the Fermi level.

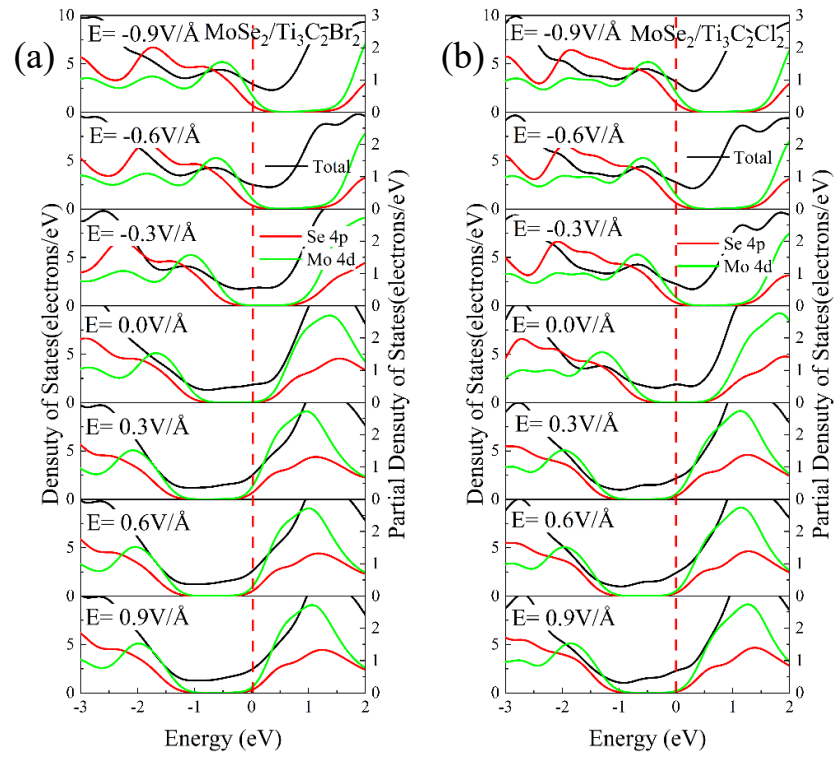

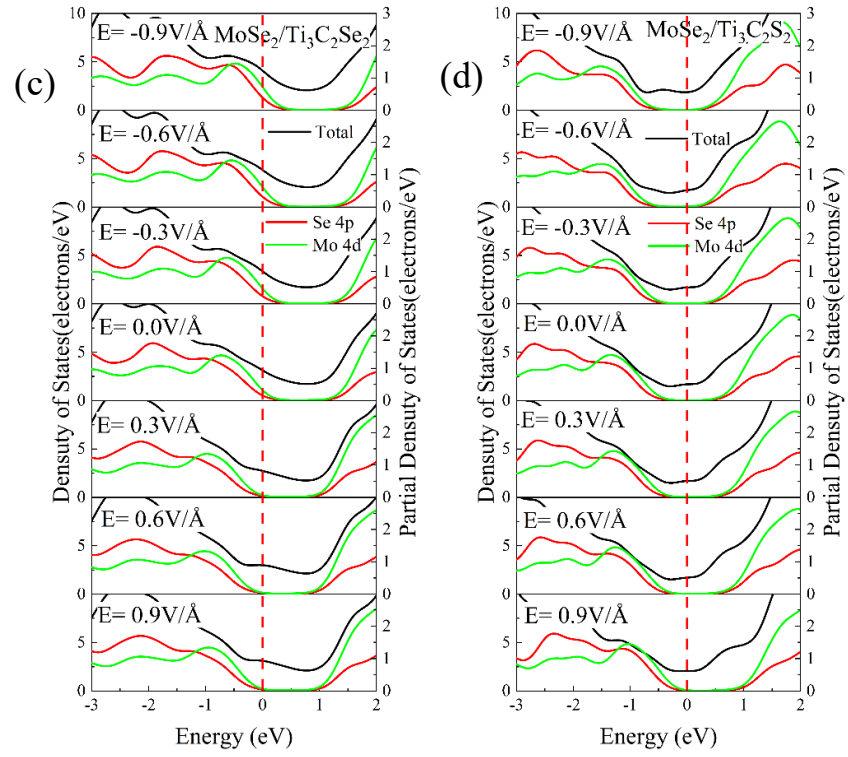

**Figure S4.** The DOS of MoSe<sub>2</sub>/Ti<sub>3</sub>C<sub>2</sub>X<sub>2</sub> and PDOS of MoSe<sub>2</sub> in MoSe<sub>2</sub>/Ti<sub>3</sub>C<sub>2</sub>X<sub>2</sub> heterostructures under different electric fields. (a) X-Br, (b) X-Cl, (c) X-Se and (d) X-S.

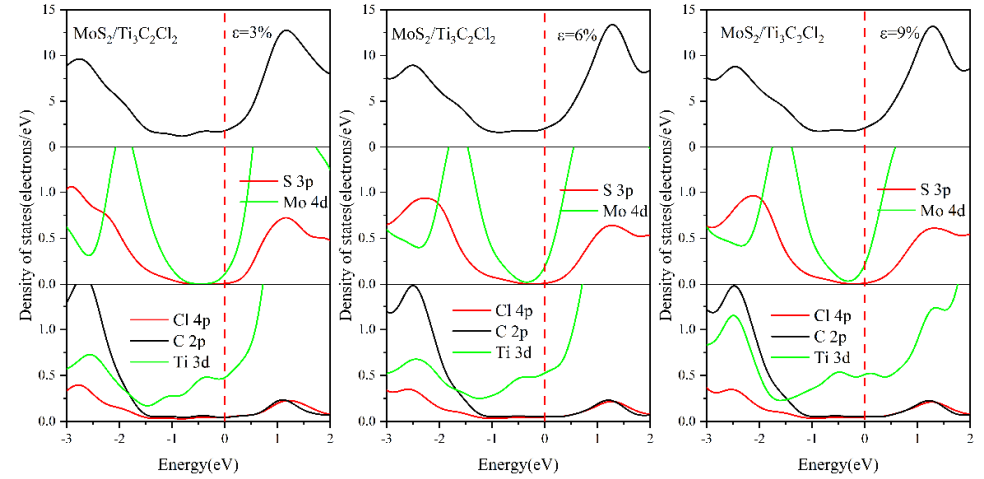

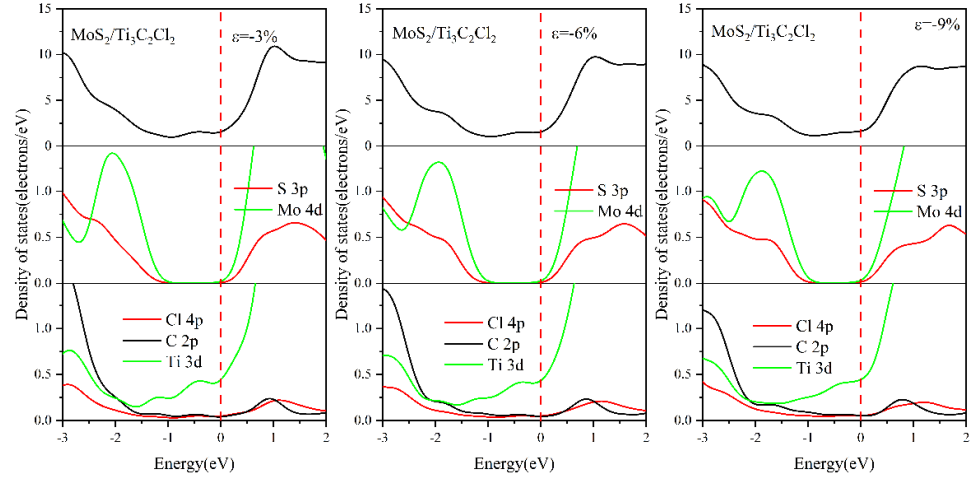

**Figure S5.** Density of states of the  $\text{MoS}_2/\text{Ti}_3\text{C}_2\text{Cl}_2$  heterostructure with different biaxial strains. The Fermi level is set to 0 eV.

Figure S5 shows the DOS of  $\text{MoS}_2/\text{Ti}_3\text{C}_2\text{Cl}_2$  heterostructure, under tensile and compressive strain, the Fermi energy level is always located at the conduction band minimum (CBM) of  $\text{MoS}_2$ . Under compressive strain, the monolayer  $\text{MoS}_2$  retains its band gap. While when the tensile strain reaches to 6%, the band gap of monolayer  $\text{MoS}_2$  disappears. It indicates that the tensile strain can significantly improve the interaction strength between the monolayer  $\text{MoS}_2$  and  $\text{Ti}_3\text{C}_2\text{Cl}_2$ .

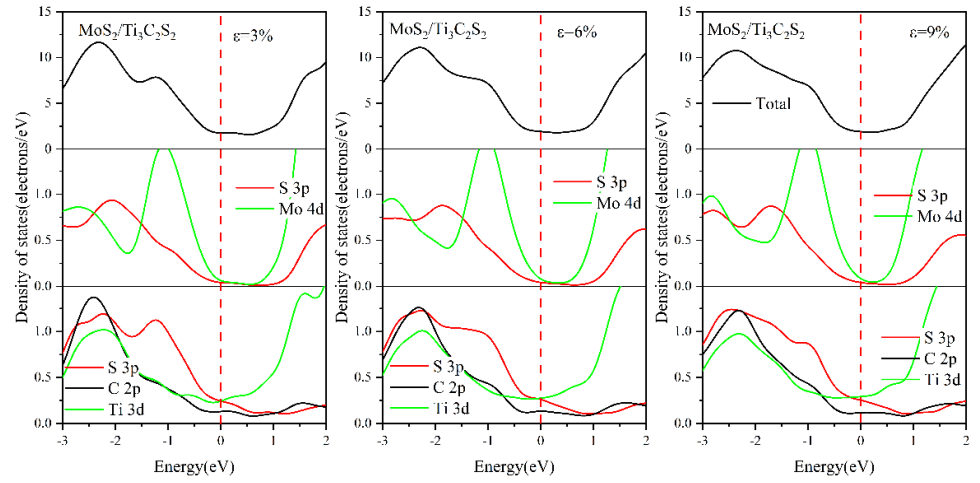

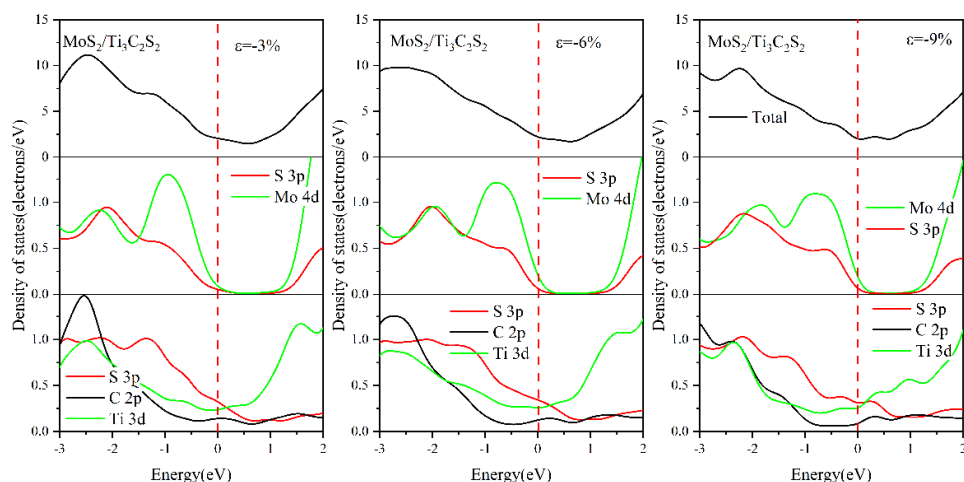

**Figure S6.** Density of states of the  $\text{MoS}_2/\text{Ti}_3\text{C}_2\text{S}_2$  heterostructure with different biaxial strains. The Fermi level is set to 0 eV.

According to the DOS of  $\text{MoS}_2/\text{Ti}_3\text{C}_2\text{S}_2$  heterostructure (see Figure S6), with the increase of compressive strain, the monolayer  $\text{MoS}_2$  can still preserve its band gap, while its band gap disappears when the tensile strain is applied, which is very similar to the  $\text{MoS}_2/\text{Ti}_3\text{C}_2\text{Cl}_2$  heterostructure.

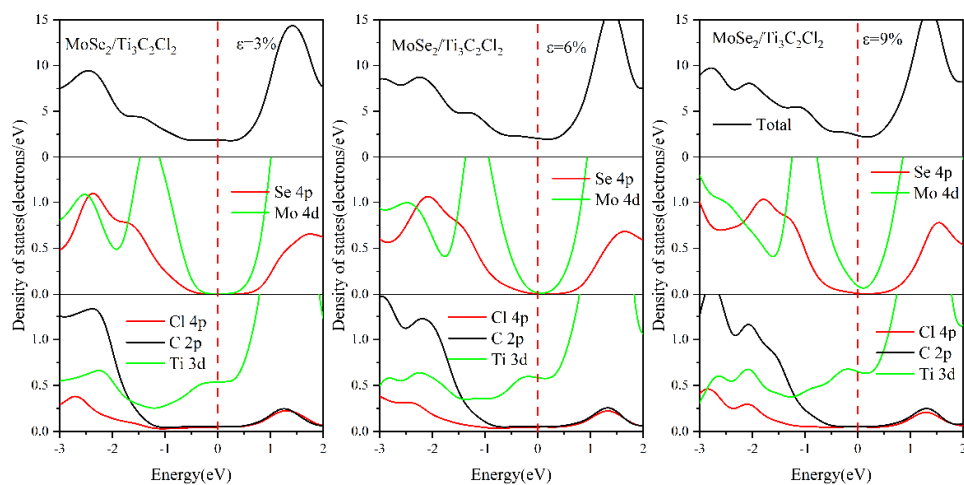

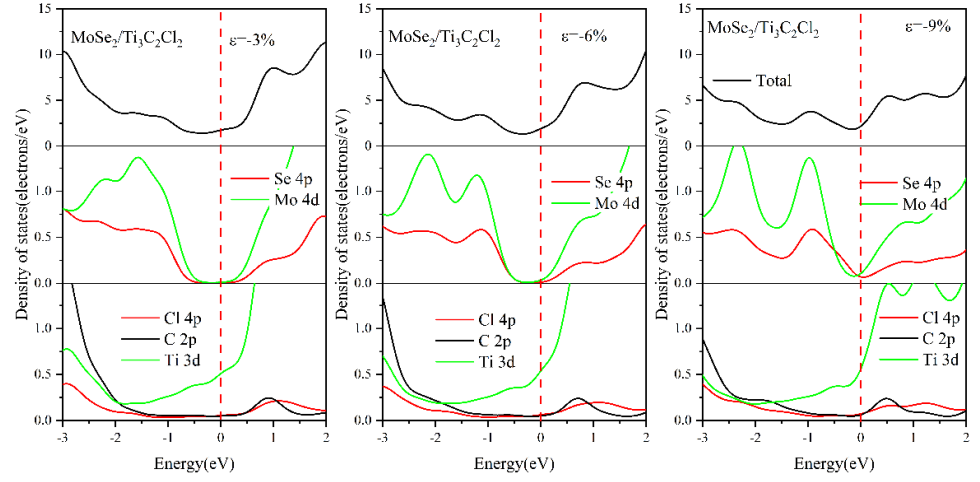

**Figure S7.** Density of states of the  $\text{MoSe}_2/\text{Ti}_3\text{C}_2\text{Cl}_2$  heterostructure with different biaxial strains. The Fermi level is set to 0 eV.

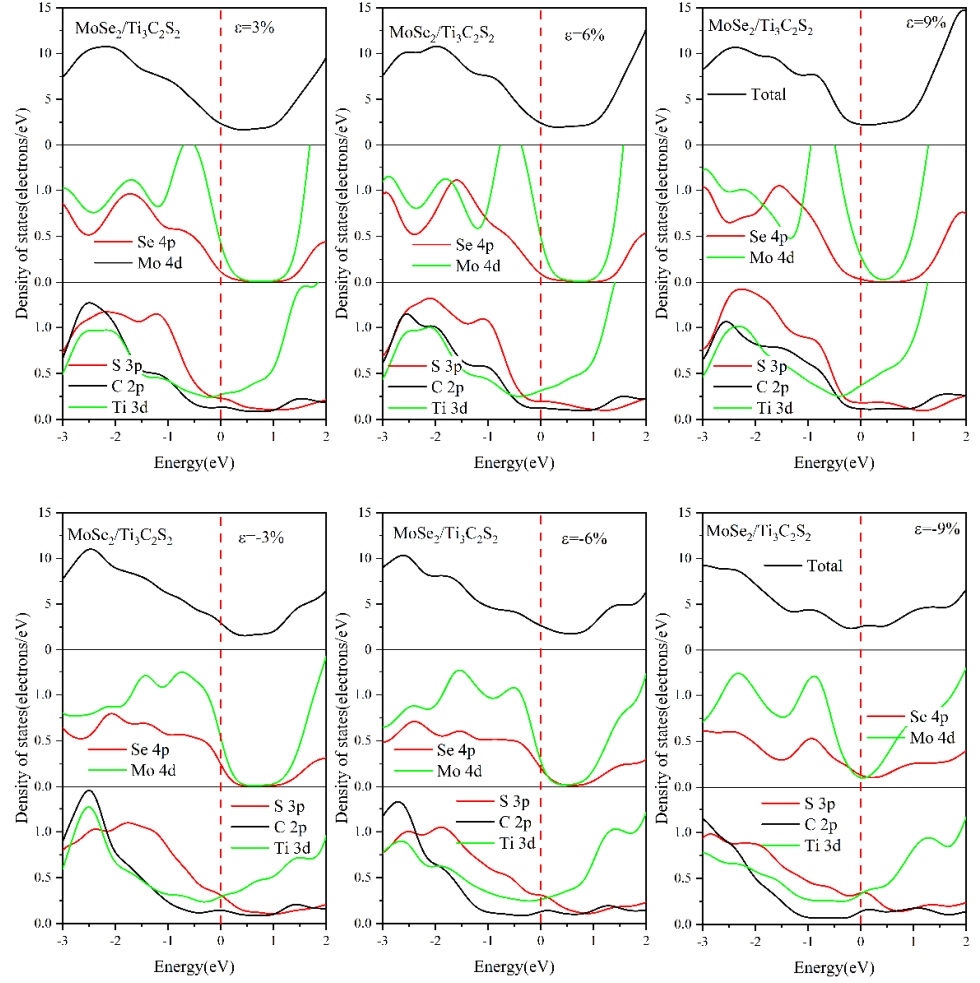

**Figure S8.** Density of states of the  $\text{MoSe}_2/\text{Ti}_3\text{C}_2\text{S}_2$  heterostructure with different biaxial strains. The Fermi level is set to 0 eV.

**Table S1.** Optimized structural parameters for the TMDs/Ti<sub>3</sub>C<sub>2</sub>X<sub>2</sub> (X = S, Se, Br, Cl) heterostructure. S1 and Se1 are surface functional groups.

| Formula                                                           | Atomic positions       |                        |                        |
|-------------------------------------------------------------------|------------------------|------------------------|------------------------|
| MoS <sub>2</sub> /Ti <sub>3</sub> C <sub>2</sub>                  | Ti1 (0,0,0.573)        | Ti2 (2/3,1/3,0.496)    | C (1/3,2/3,0.529)      |
|                                                                   | Mo (0.338,0.673,0.361) | S (0.671,0.34,0.414)   |                        |
| MoS <sub>2</sub> /Ti <sub>3</sub> C <sub>2</sub> Br <sub>2</sub>  | Ti1 (0,0,0.405)        | Ti2 (2/3,1/3,0.328)    | C (1/3,2/3,0.363)      |
|                                                                   | Br (0.5,0.5,0.541)     | Mo (1/3,2/3,0.695)     | S (2/3,1/3,0.644)      |
| MoS <sub>2</sub> /Ti <sub>3</sub> C <sub>2</sub> Cl <sub>2</sub>  | Ti1 (0,0,0.399)        | Ti2 (2/3,1/3,0.323)    | C (1/3,2/3,0.363)      |
|                                                                   | Cl (1.0,0.0,0.531)     | Mo (1/3,2/3,0.684)     | S (2/3,1/3,0.632)      |
| MoS <sub>2</sub> /Ti <sub>3</sub> C <sub>2</sub> S <sub>2</sub>   | Ti1 (0,0,0.399)        | Ti2 (2/3,1/3,0.318)    | C (1/3,2/3,0.358)      |
|                                                                   | S1 (1.0,0.0,0.533)     | Mo (0.314,0.634,0.678) | S (0.648,0.301,0.627)  |
| MoS <sub>2</sub> /Ti <sub>3</sub> C <sub>2</sub> Se <sub>2</sub>  | Ti1 (0,0,0.61)         | Ti2 (2/3,1/3,0.531)    | C (1/3,2/3,0.569)      |
|                                                                   | Se1 (1.0,0.0,0.747)    | Mo (0.336,0.667,0.33)  | S (0.671,0.334,0.381)  |
| MoSe <sub>2</sub> /Ti <sub>3</sub> C <sub>2</sub>                 | Ti1 (0,0,0.675)        | Ti2 (2/3,1/3,0.761)    | C (1/3,2/3,0.725)      |
|                                                                   | Mo (1/3,2/3,0.489)     | Se (2/3,0.1/3,0.424)   |                        |
| MoSe <sub>2</sub> /Ti <sub>3</sub> C <sub>2</sub> Br <sub>2</sub> | Ti1 (0,0,0.619)        | Ti2 (2/3,1/3,0.328)    | C (1/3,2/3,0.659)      |
|                                                                   | Br (0.5,0.5,0.488)     | Mo (1/3,2/3,0.695)     | Se (2/3,1/3,0.338)     |
| MoSe <sub>2</sub> /Ti <sub>3</sub> C <sub>2</sub> S <sub>2</sub>  | Ti1 (0,0,0.4)          | Ti2 (2/3,1/3,0.319)    | C (1/3,2/3,0.359)      |
|                                                                   | S1 (1.0,0.0,0.532)     | Mo (0.314,0.634,0.69)  | Se (0.648,0.301,0.634) |
| MoSe <sub>2</sub> /Ti <sub>3</sub> C <sub>2</sub> Cl <sub>2</sub> | Ti1 (0,0,0.63)         | Ti2 (2/3,1/3,0.554)    | C (1/3,2/3,0.589)      |
|                                                                   | Cl (0.0,1.0,0.498)     | Mo (2/3,1/3,0.338)     | Se (2/3,1/3,0.393)     |
| MoSe <sub>2</sub> /Ti <sub>3</sub> C <sub>2</sub> Se <sub>2</sub> | Ti1 (0,0,0.631)        | Ti2 (2/3,1/3,0.552)    | C (1/3,2/3,0.589)      |
|                                                                   | Se1 (1.0,0.0,0.769)    | Mo (1/3,2/3,0.32)      | Se (2/3,1/3,0.373)     |

**Table S2.** Mulliken charge (electron), bond length (Å) and bond populations of MoS<sub>2</sub>/Ti<sub>3</sub>C<sub>2</sub>.

| Species | Charge ( <i>e</i> ) | Bond Lengths (bond populations) |                |                |               |
|---------|---------------------|---------------------------------|----------------|----------------|---------------|
| C(1)    | −0.75               | C–Ti 2.05894 (0.77)             | 2.06713 (0.90) | 2.22905 (0.65) | 2.23631(0.25) |
| C(2)    | −0.75               |                                 | S–Ti           | 2.46514 (0.48) |               |
| S(1)    | −0.02               | S–Mo 2.39760 (0.91)             | 2.39760 (0.05) | 2.41895 (0.83) |               |
| S(2)    | −0.03               |                                 |                |                |               |
| Ti(1)   | 0.42                |                                 |                |                |               |
| Ti(2)   | 0.38                |                                 |                |                |               |
| Ti(3)   | 0.75                |                                 |                |                |               |
| Mo      | −0.01               |                                 |                |                |               |

**Table S3.** Mulliken charge (electron), bond length (Å) and bond populations of MoSe<sub>2</sub>/Ti<sub>3</sub>C<sub>2</sub>.

| Species | Charge ( <i>e</i> ) | Bond Lengths (bond populations) |                 |                 |               |
|---------|---------------------|---------------------------------|-----------------|-----------------|---------------|
| C(1)    | −0.75               | C–Ti 2.06351 (0.80)             | 2.11855 (0.88)  | 2.19880 (0.20)  | 2.26001(0.66) |
| C(2)    | −0.71               |                                 | Se–Ti           | 2.69638 (−0.83) |               |
| Se(1)   | 0.14                | Se–Mo 2.51199 (1.32)            | 2.51224 (−0.00) | 2.56317 (−0.19) |               |
| Se(2)   | 0.23                |                                 |                 |                 |               |
| Ti(1)   | 0.73                |                                 |                 |                 |               |
| Ti(2)   | 0.34                |                                 |                 |                 |               |
| Ti(3)   | 0.38                |                                 |                 |                 |               |
| Mo      | −0.35               |                                 |                 |                 |               |
